# Supplementary material
Source: PubMed Central journal article supplement (PMC2986257)

## **Legends to Supplementary Tables and Figures.**

**Supplementary Table 1.** LD measures,  $D'$ , for the ten *GAB2* SNPs in each sample set.

The upper-right half shows controls and the lower-left half LD.

**Supplementary Table 2.** Case-control haplotype analysis in the three sample sets, *All*, *Negative-ε4* and *Positive-ε4*. Significant permutation  $P$ -values are highlighted in bold.

**Supplementary Figure 1.** Overview of an extended LD pattern including *GAB2* in JPT (A) and CEU (B). The genomic positions are according to NCBI build 35. The vertical arrow in Fig. A indicates a break point in the LD block including *GAB2*.

**Supplementary Figure 2.** Examples of TaqMan genotyping for ten *GAB2* SNPs.

**Supplementary Figure 3.** HapMap genotype data concerning the ten SNPs of *GAB2* in CEU, CHB, JPT and YRI.

# Supplementary Table 1.

| Sample set                               | dbSNP      | rs901104 | rs1385600 | rs1007837 | rs2510038 | rs4945261 | rs7101429 | rs10793294 | rs4291702 | rs7115850 | rs2373115 |
|------------------------------------------|------------|----------|-----------|-----------|-----------|-----------|-----------|------------|-----------|-----------|-----------|
| <b>Overall set</b>                       |            |          |           |           |           |           |           |            |           |           |           |
| <i>All</i>                               | rs901104   | *        | 0.9987    | 0.996     | 0.9974    | 0.9934    | 0.9921    | -0.9725    | 0.9843    | 0.9831    | 0.9788    |
|                                          | rs1385600  | 0.9974   | *         | 0.9975    | 1         | 0.9949    | 0.98      | -0.948     | 0.9949    | 0.985     | 0.9813    |
|                                          | rs1007837  | 0.9974   | 0.9962    | *         | 0.9987    | 0.991     | 0.9772    | -0.948     | 0.991     | 0.9822    | 0.9786    |
|                                          | rs2510038  | 0.9987   | 0.9975    | 0.9975    | *         | 0.9962    | 0.9962    | -0.9738    | 0.9924    | 0.9875    | 0.9822    |
|                                          | rs4945261  | 0.9935   | 0.9962    | 0.9923    | 0.9937    | *         | 0.9987    | -0.9735    | 1         | 0.99      | 0.9847    |
|                                          | rs7101429  | 0.9921   | 0.9798    | 0.977     | 0.9936    | 1         | *         | -0.9845    | 0.9987    | 0.9887    | 0.9699    |
|                                          | rs10793294 | -0.9875  | -0.9526   | -0.9526   | -0.982    | -1        | -1        | *          | -1        | -0.974    | -0.9485   |
|                                          | rs4291702  | 0.987    | 0.9949    | 0.9897    | 0.9911    | 0.9975    | 1         | -1         | *         | 0.9899    | 0.9846    |
|                                          | rs7115850  | 0.9832   | 0.98      | 0.9798    | 0.9862    | 0.9886    | 0.9872    | -0.9762    | 0.9898    | *         | 0.9937    |
|                                          | rs2373115  | 0.9828   | 0.9861    | 0.9847    | 0.9859    | 0.9897    | 0.9782    | -0.9461    | 0.9884    | 0.9937    | *         |
| <b>Subsets</b>                           |            |          |           |           |           |           |           |            |           |           |           |
| <i>Negative- <math>\epsilon</math> 4</i> | rs901104   | *        | 0.9984    | 0.9952    | 0.9969    | 0.9936    | 0.9936    | -0.9668    | 0.9826    | 0.9858    | 0.9808    |
|                                          | rs1385600  | 0.9946   | *         | 0.997     | 1         | 0.9939    | 0.979     | -0.9378    | 0.9939    | 0.985     | 0.9836    |
|                                          | rs1007837  | 0.9973   | 0.9974    | *         | 0.9985    | 0.9892    | 0.9787    | -0.9379    | 0.9892    | 0.9817    | 0.9818    |
|                                          | rs2510038  | 0.9973   | 0.9974    | 1         | *         | 0.997     | 0.9985    | -0.9685    | 0.9909    | 0.991     | 0.9848    |
|                                          | rs4945261  | 0.9892   | 0.9947    | 0.9947    | 0.9947    | *         | 1         | -0.9684    | 1         | 0.9925    | 0.9863    |
|                                          | rs7101429  | 0.9861   | 0.9761    | 0.9732    | 0.9893    | 1         | *         | -0.9815    | 1         | 0.991     | 0.9715    |
|                                          | rs10793294 | -0.9862  | -0.9477   | -0.9482   | -0.9738   | -1        | -1        | *          | -1        | -0.9689   | -0.9384   |
|                                          | rs4291702  | 0.9809   | 0.9894    | 0.9892    | 0.9894    | 0.9973    | 1         | -1         | *         | 0.9924    | 0.9862    |
|                                          | rs7115850  | 0.9757   | 0.9714    | 0.9789    | 0.9816    | 0.9895    | 0.9867    | -0.974     | 0.9894    | *         | 0.9925    |
|                                          | rs2373115  | 0.9779   | 0.9841    | 0.9839    | 0.9838    | 0.9919    | 0.9784    | -0.9472    | 0.9919    | 0.9921    | *         |
| <i>Positive- <math>\epsilon</math> 4</i> | rs901104   | *        | 1         | 1         | 1         | 0.9923    | 0.9847    | -1         | 0.9923    | 0.9698    | 0.9689    |
|                                          | rs1385600  | 1        | *         | 1         | 1         | 1         | 1         | -1         | 1         | 0.9848    | 0.9772    |
|                                          | rs1007837  | 0.9975   | 0.9976    | *         | 1         | 1         | 1         | -1         | 1         | 0.9846    | 0.9769    |
|                                          | rs2510038  | 1        | 0.9976    | 0.9951    | *         | 1         | 1         | -1         | 1         | 0.9849    | 0.9695    |
|                                          | rs4945261  | 0.9975   | 0.9976    | 0.9902    | 0.9951    | *         | 1         | -1         | 1         | 0.9848    | 0.9767    |
|                                          | rs7101429  | 0.9975   | 0.9831    | 0.9804    | 0.9975    | 1         | *         | -1         | 1         | 0.9774    | 0.9767    |
|                                          | rs10793294 | -0.9885  | -0.9565   | -0.9562   | -0.9889   | -1        | -1        | *          | -1        | -1        | -1        |
|                                          | rs4291702  | 0.9925   | 1         | 0.9902    | 0.9927    | 1         | 1         | -1         | *         | 0.9848    | 0.9767    |
|                                          | rs7115850  | 0.9901   | 0.9879    | 0.9805    | 0.9903    | 0.9879    | 0.9877    | -0.9779    | 0.9903    | *         | 1         |
|                                          | rs2373115  | 0.9874   | 0.988     | 0.9853    | 0.9878    | 0.9877    | 0.9779    | -0.9451    | 0.9852    | 0.9951    | *         |

## Supplementary Table 2.

| Sample set                               | Haplotype                | Frequency |         | Permutation $P$<br>(10,000) | OR (95% CIs)       |
|------------------------------------------|--------------------------|-----------|---------|-----------------------------|--------------------|
|                                          |                          | LOAD      | Control |                             |                    |
| <b>Overall set</b>                       |                          |           |         |                             |                    |
| <i>All</i>                               | [H1] A-G-C-A-A-G-C-A-C-A | 0.4147    | 0.4145  | 1                           | 1.00 (0.91 - 1.10) |
|                                          | [H2] G-A-T-G-G-A-C-G-G-C | 0.3681    | 0.35    | 0.1254                      | 1.08 (0.99 - 1.20) |
|                                          | [H3] G-A-T-G-G-A-A-G-G-C | 0.1868    | 0.1988  | 0.2441                      | 0.93 (0.82 - 1.05) |
|                                          | Others                   | 0.0304    | 0.0367  | -                           | -                  |
|                                          | Global                   | -         | -       | <b>0.0017</b>               | -                  |
| <b>Subsets</b>                           |                          |           |         |                             |                    |
| <i>Negative- <math>\epsilon 4</math></i> | [H1] A-G-C-A-A-G-C-A-C-A | 0.4183    | 0.4161  | 0.9237                      | 0.99 (0.88 - 1.13) |
|                                          | [H2] G-A-T-G-G-A-C-G-G-C | 0.3739    | 0.3503  | 0.1196                      | 0.90 (0.79 - 1.03) |
|                                          | [H3] G-A-T-G-G-A-A-G-G-C | 0.1741    | 0.195   | 0.0974                      | 1.15 (0.98 - 1.35) |
|                                          | Others                   | 0.0337    | 0.0386  | -                           | -                  |
|                                          | Global                   | -         | -       | 0.0595                      | -                  |
| <i>Positive- <math>\epsilon 4</math></i> | [H1] A-G-C-A-A-G-C-A-C-A | 0.4114    | 0.4064  | 0.8432                      | 1.02 (0.84 - 1.24) |
|                                          | [H2] G-A-T-G-G-A-C-G-G-C | 0.3632    | 0.3509  | 0.6096                      | 1.06 (0.86 - 1.29) |
|                                          | [H3] G-A-T-G-G-A-A-G-G-C | 0.198     | 0.2156  | 0.3599                      | 0.90 (0.71 - 1.13) |
|                                          | Others                   | 0.0274    | 0.0271  | -                           | -                  |
|                                          | Global                   | -         | -       | 0.3255                      | -                  |

# Supplementary Figure 1.

A

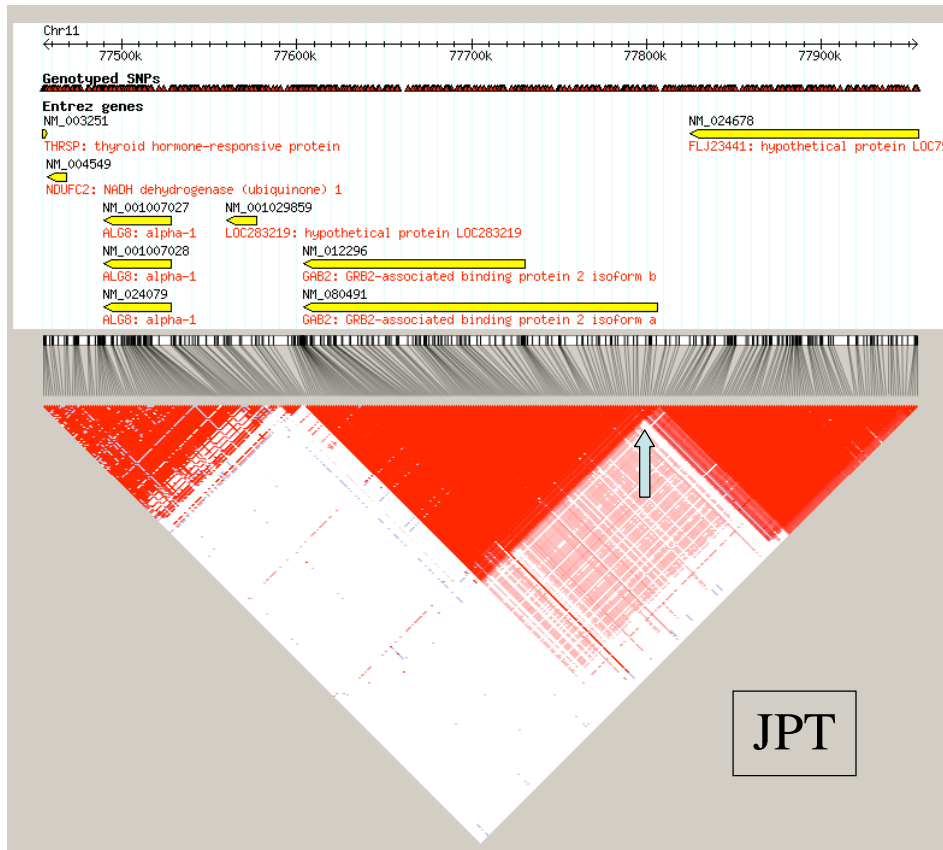

B

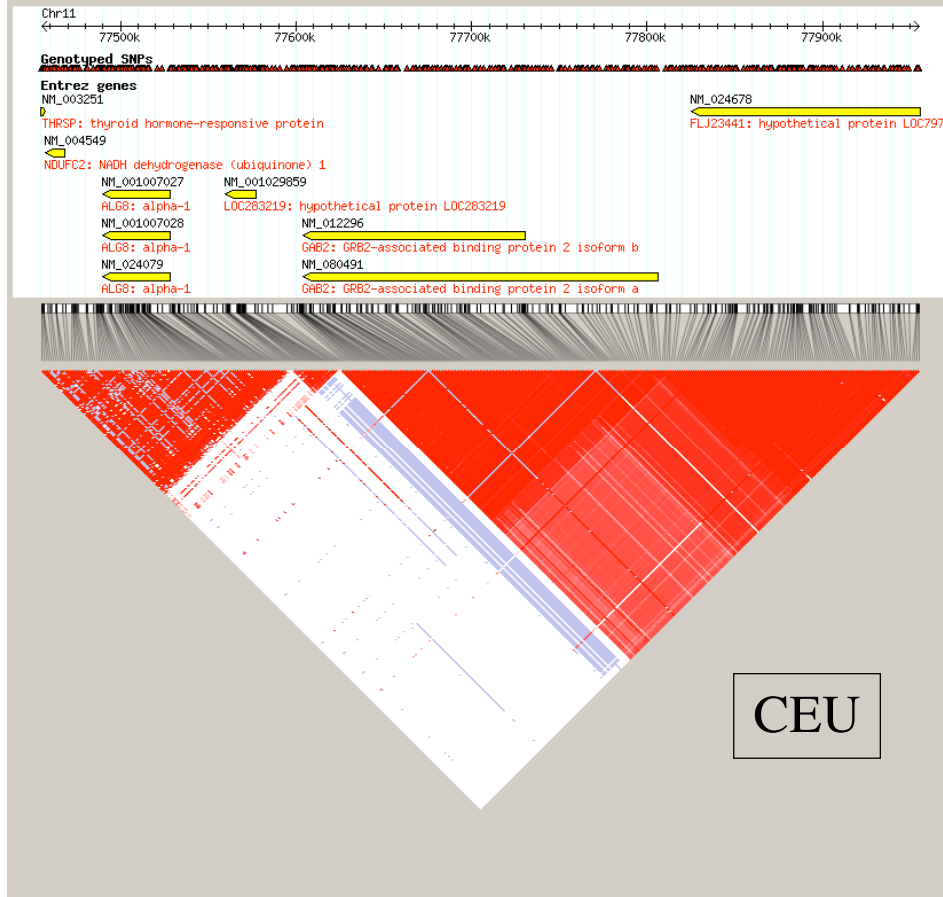

# Supplementary Figure 2.

rs901104

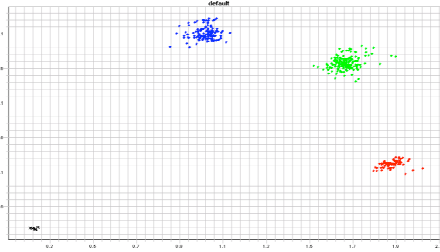

rs1385600

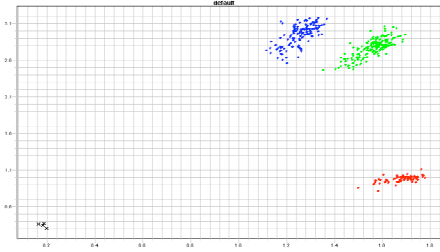

rs1007837

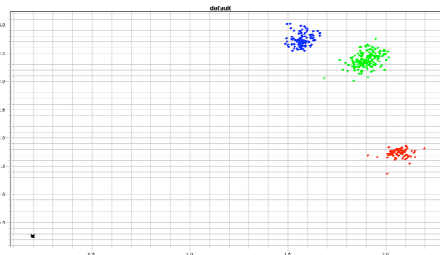

rs2510038

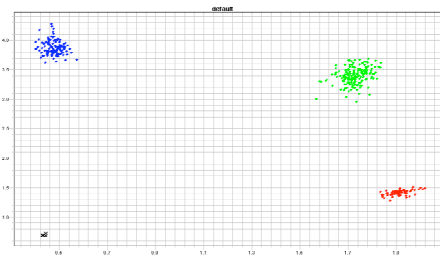

rs4945261

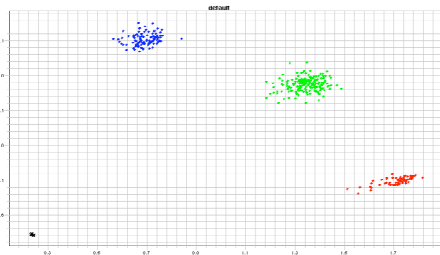

rs7101429

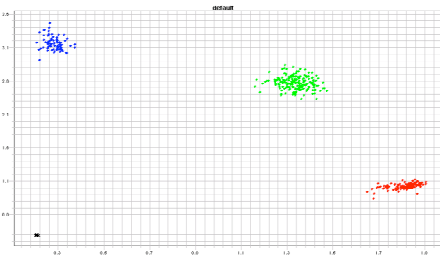

rs10793294

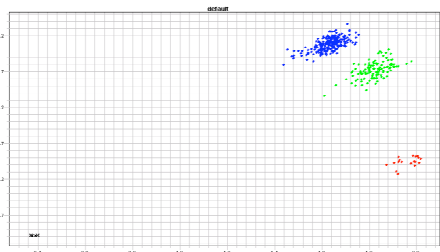

rs4291702

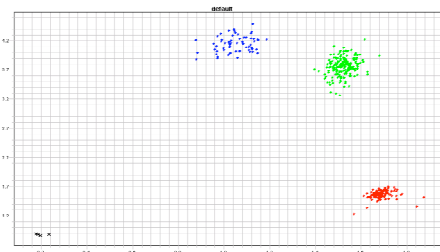

rs7115850

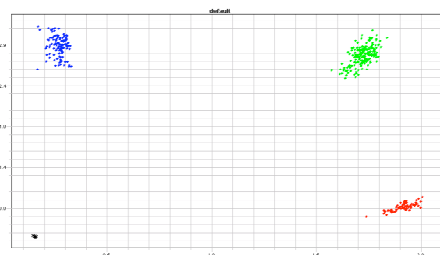

rs2373115

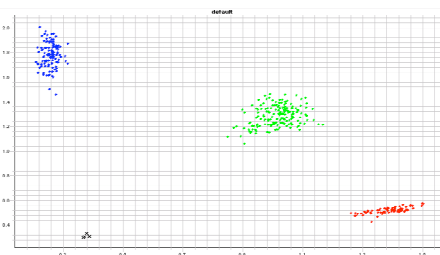

# Supplementary Figure 3.

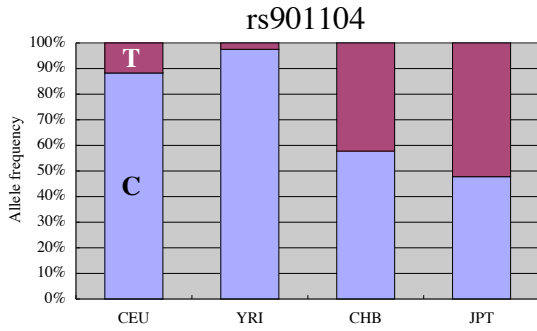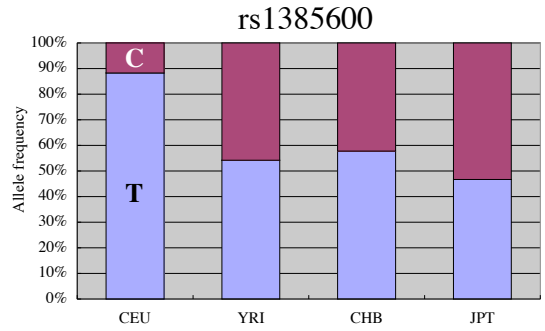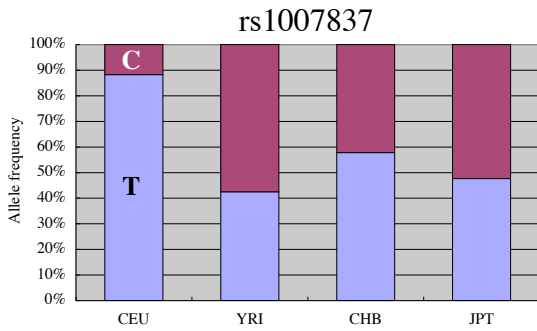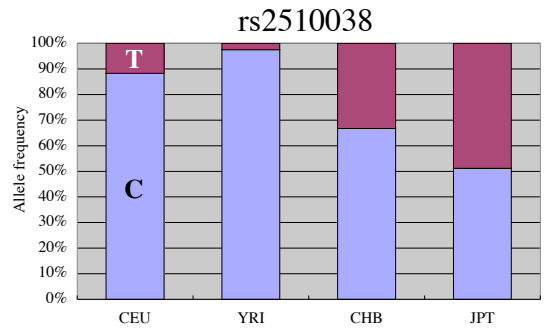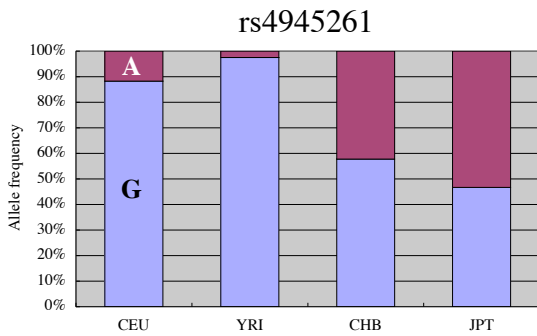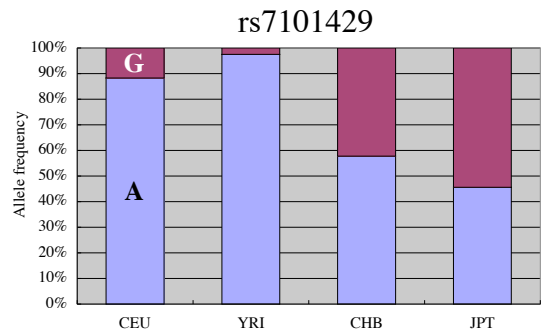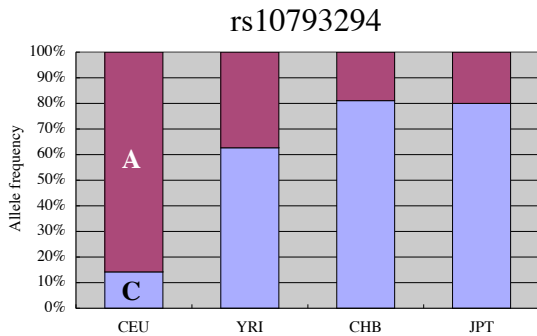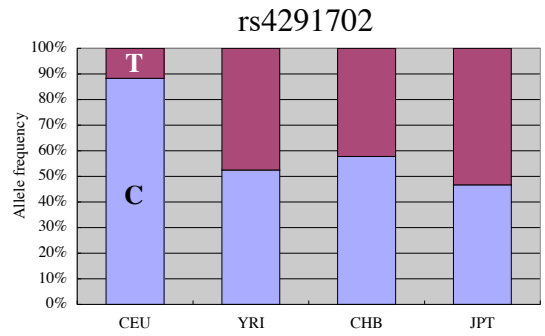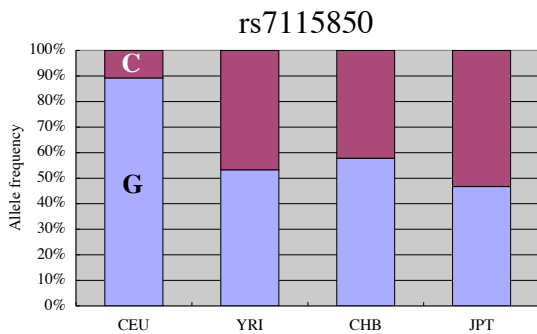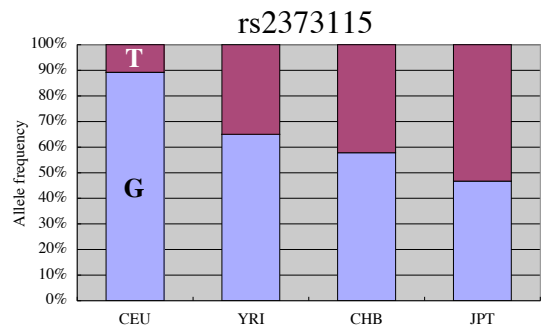

Supplement: ejhg2008181x1.pdf [file ejhg2008181x1.pdf]
